# Supplementary material for: Improved Understanding of Interactions between Risk Factors for Child Obesity May Lead to Better Designed Prevention Policies and Programs in Indonesia
Source: PubMed Central journal article supplement (PMC7019618; doi:10.3390/nu12010175), 2020-01-08
Supplement: nutrients-12-00175-s001.pdf [file nutrients-12-00175-s001.pdf]

**Table S1. SEMI QUANTITATIVE FOOD FREQUENCY (SQFF) FORM**

**Guideline:**

- Write down the frequency of consumption of each type of food / food ingredients in days, weeks, 1 month, 3 months or never consume
- Household portion: plate, spoon, slice, glass, bowl, etc.

**A. Junk Food**

| No. | Brand name                             | Amount of consumption (each time) |       | Frequency of consumption |      |         |         | Energy (Kcal) | Saturated fat (grams) | Carb (grams) | Natrium (grams) |
|-----|----------------------------------------|-----------------------------------|-------|--------------------------|------|---------|---------|---------------|-----------------------|--------------|-----------------|
|     |                                        | Household portion                 | Grams | Day                      | Week | 1 month | 3 month |               |                       |              |                 |
| A.  | <b>Sweet cereals</b>                   |                                   |       |                          |      |         |         |               |                       |              |                 |
|     | Instant cereal (Energen®)              |                                   |       |                          |      |         |         |               |                       |              |                 |
|     | Instant cereal (Koko Crunch®)          |                                   |       |                          |      |         |         |               |                       |              |                 |
|     | Others, specify....                    |                                   |       |                          |      |         |         |               |                       |              |                 |
| B.  | <b>Instant rice / noodle products</b>  |                                   |       |                          |      |         |         |               |                       |              |                 |
|     | Instant noodles (Migelas®)             |                                   |       |                          |      |         |         |               |                       |              |                 |
|     | Fried noodles ready to eat (Spix Mie®) |                                   |       |                          |      |         |         |               |                       |              |                 |
|     | Instant noodles (Indomie®)             |                                   |       |                          |      |         |         |               |                       |              |                 |
|     | Instant porridge (Super Bubur®)        |                                   |       |                          |      |         |         |               |                       |              |                 |
|     | Others, specify....                    |                                   |       |                          |      |         |         |               |                       |              |                 |
| C.  | <b>Sweet snacks</b>                    |                                   |       |                          |      |         |         |               |                       |              |                 |
|     | Richeese® wafer                        |                                   |       |                          |      |         |         |               |                       |              |                 |
|     | Tango® wafer                           |                                   |       |                          |      |         |         |               |                       |              |                 |
|     | Tango® waffle                          |                                   |       |                          |      |         |         |               |                       |              |                 |
|     | Goriorio® biscuit                      |                                   |       |                          |      |         |         |               |                       |              |                 |
|     | Gery Toya-toya® biscuit                |                                   |       |                          |      |         |         |               |                       |              |                 |
|     | Bimbim® biscuit                        |                                   |       |                          |      |         |         |               |                       |              |                 |
|     | Selamat® biscuit                       |                                   |       |                          |      |         |         |               |                       |              |                 |
|     | Oreo® biscuit                          |                                   |       |                          |      |         |         |               |                       |              |                 |
|     | Others, specify....                    |                                   |       |                          |      |         |         |               |                       |              |                 |
| D.  | <b>Processed Meat</b>                  |                                   |       |                          |      |         |         |               |                       |              |                 |
|     | Chicken sausage (So Nice®)             |                                   |       |                          |      |         |         |               |                       |              |                 |
|     | Fish Sausage                           |                                   |       |                          |      |         |         |               |                       |              |                 |
|     | Beef sausage                           |                                   |       |                          |      |         |         |               |                       |              |                 |
|     | Goat Sausage                           |                                   |       |                          |      |         |         |               |                       |              |                 |
|     | Others, specify....                    |                                   |       |                          |      |         |         |               |                       |              |                 |
| E.  | <b>Salty Snacks</b>                    |                                   |       |                          |      |         |         |               |                       |              |                 |
|     | Potato chips (Chitato®)                |                                   |       |                          |      |         |         |               |                       |              |                 |
|     | Potato chips (Leo®)                    |                                   |       |                          |      |         |         |               |                       |              |                 |
|     | Pilus Garuda                           |                                   |       |                          |      |         |         |               |                       |              |                 |
|     | cheese wafer ( Zuper®)                 |                                   |       |                          |      |         |         |               |                       |              |                 |
|     | Pop Corn                               |                                   |       |                          |      |         |         |               |                       |              |                 |
|     | Cracker                                |                                   |       |                          |      |         |         |               |                       |              |                 |
|     | Salted Beans                           |                                   |       |                          |      |         |         |               |                       |              |                 |
|     | Others, specify....                    |                                   |       |                          |      |         |         |               |                       |              |                 |
| F.  | <b>Commercial Juices/ Fruit Drinks</b> |                                   |       |                          |      |         |         |               |                       |              |                 |
|     | Buavita®                               |                                   |       |                          |      |         |         |               |                       |              |                 |
|     | Minute Maid Pulpy Orange®              |                                   |       |                          |      |         |         |               |                       |              |                 |
|     | Tipco Kalbe®                           |                                   |       |                          |      |         |         |               |                       |              |                 |
|     | Others, specify....                    |                                   |       |                          |      |         |         |               |                       |              |                 |
| G.  | <b>Milk and milk products</b>          |                                   |       |                          |      |         |         |               |                       |              |                 |
|     | ULTRA milk®                            |                                   |       |                          |      |         |         |               |                       |              |                 |
|     | Frisian Flag®                          |                                   |       |                          |      |         |         |               |                       |              |                 |
|     | Dancow®                                |                                   |       |                          |      |         |         |               |                       |              |                 |
|     | MILO®                                  |                                   |       |                          |      |         |         |               |                       |              |                 |
|     | Sweetened condensed milk               |                                   |       |                          |      |         |         |               |                       |              |                 |
|     | Cheese (KRAFT®)                        |                                   |       |                          |      |         |         |               |                       |              |                 |
|     | Yoghurt                                |                                   |       |                          |      |         |         |               |                       |              |                 |
|     | Others, specify....                    |                                   |       |                          |      |         |         |               |                       |              |                 |







|           |                       |  |  |  |  |  |  |  |  |  |  |
|-----------|-----------------------|--|--|--|--|--|--|--|--|--|--|
|           | Mango (Kweni)         |  |  |  |  |  |  |  |  |  |  |
|           | Pometia pinnata       |  |  |  |  |  |  |  |  |  |  |
|           | Passion fruit         |  |  |  |  |  |  |  |  |  |  |
|           | Mangosteen            |  |  |  |  |  |  |  |  |  |  |
|           | Melon                 |  |  |  |  |  |  |  |  |  |  |
|           | Dragon fruit          |  |  |  |  |  |  |  |  |  |  |
|           | Jackfruit Cook        |  |  |  |  |  |  |  |  |  |  |
|           | Pineapple             |  |  |  |  |  |  |  |  |  |  |
|           | Papaya (mature)       |  |  |  |  |  |  |  |  |  |  |
|           | Banana (Ambon)        |  |  |  |  |  |  |  |  |  |  |
|           | Banana (Plantain)     |  |  |  |  |  |  |  |  |  |  |
|           | Banana (Pisang susu)  |  |  |  |  |  |  |  |  |  |  |
|           | Banana (Pisang kapok) |  |  |  |  |  |  |  |  |  |  |
|           | Pear                  |  |  |  |  |  |  |  |  |  |  |
|           | Rambutan              |  |  |  |  |  |  |  |  |  |  |
|           | Sapodilla (Sawo)      |  |  |  |  |  |  |  |  |  |  |
|           | Watermelon            |  |  |  |  |  |  |  |  |  |  |
|           | Snakefruit (Salak)    |  |  |  |  |  |  |  |  |  |  |
|           | Soursop               |  |  |  |  |  |  |  |  |  |  |
|           | Sugar-apple           |  |  |  |  |  |  |  |  |  |  |
|           | Strawberry            |  |  |  |  |  |  |  |  |  |  |
|           | Kiwi                  |  |  |  |  |  |  |  |  |  |  |
|           | Others, specify....   |  |  |  |  |  |  |  |  |  |  |
|           |                       |  |  |  |  |  |  |  |  |  |  |
| <b>6.</b> | <b>Oil-fat</b>        |  |  |  |  |  |  |  |  |  |  |
|           | Palm oil              |  |  |  |  |  |  |  |  |  |  |
|           | Corn oil              |  |  |  |  |  |  |  |  |  |  |
|           | Chicken Fat           |  |  |  |  |  |  |  |  |  |  |
|           | Others, specify....   |  |  |  |  |  |  |  |  |  |  |
|           |                       |  |  |  |  |  |  |  |  |  |  |
| <b>7.</b> | <b>Beverages</b>      |  |  |  |  |  |  |  |  |  |  |
|           | <b>a. Tea</b>         |  |  |  |  |  |  |  |  |  |  |
|           | - Sweet tea           |  |  |  |  |  |  |  |  |  |  |
|           | - Non sugary tea      |  |  |  |  |  |  |  |  |  |  |
|           | Others, specify....   |  |  |  |  |  |  |  |  |  |  |
|           |                       |  |  |  |  |  |  |  |  |  |  |
|           | <b>b. Fruit Juice</b> |  |  |  |  |  |  |  |  |  |  |
|           | - Guava juice         |  |  |  |  |  |  |  |  |  |  |
|           | - Mango juice         |  |  |  |  |  |  |  |  |  |  |
|           | - Avocado juice       |  |  |  |  |  |  |  |  |  |  |
|           | Others, specify....   |  |  |  |  |  |  |  |  |  |  |
|           |                       |  |  |  |  |  |  |  |  |  |  |

**Table S2. MODIFIED CHILDREN PHYSICAL ACTIVITY QUESTIONNAIRE (M-CPAQ)**

Note:

- Column 1 shows period information
- Column 2 shows specific activities
- Column 3 shows what time the specific activities done
- Column 4 indicates whether the specific activities done or not
- Column 5 shows frequency of specific activities
- Column 6 shows duration (in minute/hour) of specific activities done
- Column 7 shows what TV program watched. Only for **screen-based activities**

| 1<br>Period                             | 2<br>Specific activities                                | A. Monday – Friday |                |                       |                               |                  | B. Saturday |                |                       |                               |                  |
|-----------------------------------------|---------------------------------------------------------|--------------------|----------------|-----------------------|-------------------------------|------------------|-------------|----------------|-----------------------|-------------------------------|------------------|
|                                         |                                                         | 3A<br>Time         | 4A<br>Yes / No | 5A<br>How many times? | 6A<br>Duration (minute/ hour) | 7A<br>TV program | 3A<br>Time  | 4A<br>Yes / No | 5A<br>How many times? | 6A<br>Duration (minute/ hour) | 7A<br>TV program |
| Wake up to go to school                 | What time do you wake up in the morning?<br>..... am    |                    |                |                       |                               |                  |             |                |                       |                               |                  |
|                                         | <b>Screen-based activity</b>                            |                    |                |                       |                               |                  |             |                |                       |                               |                  |
|                                         | Watching TV                                             |                    | Yes No         |                       |                               |                  |             | Yes No         |                       |                               |                  |
|                                         | Playing (PlayStation, Gameboy, etc.)                    |                    | Yes No         |                       |                               |                  |             | Yes No         |                       |                               |                  |
|                                         | Using computer/laptop/tablet                            |                    | Yes No         |                       |                               |                  |             | Yes No         |                       |                               |                  |
|                                         | Others, specify _____                                   |                    | Yes No         |                       |                               |                  |             | Yes No         |                       |                               |                  |
|                                         | <b>Physical activity</b>                                |                    |                |                       |                               |                  |             |                |                       |                               |                  |
|                                         | Cleaning up the rooms / house (e.g. sweeping)           |                    | Yes No         |                       |                               |                  |             | Yes No         |                       |                               |                  |
|                                         | Washing (clothes, plates)                               |                    | Yes No         |                       |                               |                  |             | Yes No         |                       |                               |                  |
|                                         | Clean yourself (showering, clothes)                     |                    | Yes No         |                       |                               |                  |             | Yes No         |                       |                               |                  |
|                                         | Breakfast                                               |                    | Yes No         |                       |                               |                  |             | Yes No         |                       |                               |                  |
|                                         | Others, specify _____                                   |                    | Yes No         |                       |                               |                  |             | Yes No         |                       |                               |                  |
| What time do you go to school? ..... am |                                                         |                    |                |                       |                               |                  |             |                |                       |                               |                  |
| At school                               | Study                                                   |                    | Yes No         |                       |                               |                  |             | Yes No         |                       |                               |                  |
|                                         | Study physical activity education (PE)<br>Specify _____ |                    | Yes No         |                       |                               |                  |             | Yes No         |                       |                               |                  |
|                                         | Study computer                                          |                    | Yes No         |                       |                               |                  |             | Yes No         |                       |                               |                  |
|                                         | Commute to school using car (round trip)                |                    | Yes No         |                       |                               |                  |             | Yes No         |                       |                               |                  |
|                                         | Commute to school using bike (round trip)               |                    | Yes No         |                       |                               |                  |             | Yes No         |                       |                               |                  |
|                                         | Commute to school by walk (round trip)                  |                    | Yes No         |                       |                               |                  |             | Yes No         |                       |                               |                  |
|                                         | During recess                                           |                    |                |                       |                               |                  |             |                |                       |                               |                  |
|                                         | - Sit and chat                                          |                    | Yes No         |                       |                               |                  |             | Yes No         |                       |                               |                  |
|                                         | - Study/ do assignment                                  |                    | Yes No         |                       |                               |                  |             | Yes No         |                       |                               |                  |
|                                         | - Play _____                                            |                    | Yes No         |                       |                               |                  |             | Yes No         |                       |                               |                  |
| Eat/ snack                              |                                                         | Yes No             |                |                       |                               |                  | Yes No      |                |                       |                               |                  |
| Extracurricular                         |                                                         |                    |                |                       |                               |                  |             |                |                       |                               |                  |
| - Scout                                 |                                                         | Yes No             |                |                       |                               |                  | Yes No      |                |                       |                               |                  |
| - Computer                              |                                                         | Yes No             |                |                       |                               |                  | Yes No      |                |                       |                               |                  |
| - Dance                                 |                                                         | Yes No             |                |                       |                               |                  | Yes No      |                |                       |                               |                  |

INDONESIAN SCHOOL CHILDREN OBESITY RESEARCH

| 1<br>Period                               | 2<br>Specific activities                      | A. Monday – Friday |                |                             |                                  |                  | B. Saturday |                |                          |                                  |                  |
|-------------------------------------------|-----------------------------------------------|--------------------|----------------|-----------------------------|----------------------------------|------------------|-------------|----------------|--------------------------|----------------------------------|------------------|
|                                           |                                               | 3A<br>Time         | 4A<br>Yes / No | 5A<br>How<br>many<br>times? | 6A<br>Duration<br>(minute/ hour) | 7A<br>TV program | 3A<br>Time  | 4A<br>Yes / No | 5A<br>How many<br>times? | 6A<br>Duration<br>(minute/ hour) | 7A<br>TV program |
|                                           | - Marching band                               |                    | Yes No         |                             |                                  |                  |             | Yes No         |                          |                                  |                  |
|                                           | Others, specify _____                         |                    | Yes No         |                             |                                  |                  |             | Yes No         |                          |                                  |                  |
|                                           | Additional lessons                            |                    | Yes No         |                             |                                  |                  |             | Yes No         |                          |                                  |                  |
|                                           | Others, specify _____                         |                    | Yes No         |                             |                                  |                  |             | Yes No         |                          |                                  |                  |
| After school until sunset                 | <b>Screen-based activity</b>                  |                    |                |                             |                                  |                  |             |                |                          |                                  |                  |
|                                           | Watching TV                                   |                    | Yes No         |                             |                                  |                  |             | Yes No         |                          |                                  |                  |
|                                           | Playing (PlayStation, Gameboy, etc.)          |                    | Yes No         |                             |                                  |                  |             | Yes No         |                          |                                  |                  |
|                                           | Using computer/laptop/tablet                  |                    | Yes No         |                             |                                  |                  |             | Yes No         |                          |                                  |                  |
|                                           | Others, specify _____                         |                    | Yes No         |                             |                                  |                  |             | Yes No         |                          |                                  |                  |
|                                           | <b>Physical activity</b>                      |                    |                |                             |                                  |                  |             |                |                          |                                  |                  |
|                                           | Lunch                                         |                    | Yes No         |                             |                                  |                  |             | Yes No         |                          |                                  |                  |
|                                           | Cleaning up the rooms / house (e.g. sweeping) |                    | Yes No         |                             |                                  |                  |             | Yes No         |                          |                                  |                  |
|                                           | Washing (clothes, plates)                     |                    | Yes No         |                             |                                  |                  |             | Yes No         |                          |                                  |                  |
|                                           | Clean yourself (showering, clothes)           |                    | Yes No         |                             |                                  |                  |             | Yes No         |                          |                                  |                  |
|                                           | Siestas                                       |                    | Yes No         |                             |                                  |                  |             | Yes No         |                          |                                  |                  |
|                                           | Qur'an class/ course                          |                    | Yes No         |                             |                                  |                  |             | Yes No         |                          |                                  |                  |
|                                           | Play                                          |                    |                |                             |                                  |                  |             |                |                          |                                  |                  |
|                                           | - Football                                    |                    | Yes No         |                             |                                  |                  |             |                | Yes No                   |                                  |                  |
|                                           | - Bike                                        |                    | Yes No         |                             |                                  |                  |             |                | Yes No                   |                                  |                  |
| - Badminton                               |                                               | Yes No             |                |                             |                                  |                  |             | Yes No         |                          |                                  |                  |
| - Skip rope                               |                                               | Yes No             |                |                             |                                  |                  |             | Yes No         |                          |                                  |                  |
| - Playing cards                           |                                               | Yes No             |                |                             |                                  |                  |             | Yes No         |                          |                                  |                  |
| - Board game (chees, monopoly, etc.)      |                                               | Yes No             |                |                             |                                  |                  |             | Yes No         |                          |                                  |                  |
| Others _____                              |                                               | Yes No             |                |                             |                                  |                  |             | Yes No         |                          |                                  |                  |
| Others, specify _____                     |                                               | Yes No             |                |                             |                                  |                  |             | Yes No         |                          |                                  |                  |
| At bedtime                                | <b>Screen-based activity</b>                  |                    |                |                             |                                  |                  |             |                |                          |                                  |                  |
|                                           | Watching TV                                   |                    | Yes No         |                             |                                  |                  |             | Yes No         |                          |                                  |                  |
|                                           | Playing (PlayStation, Gameboy, etc.)          |                    | Yes No         |                             |                                  |                  |             | Yes No         |                          |                                  |                  |
|                                           | Using computer/laptop/tablet                  |                    | Yes No         |                             |                                  |                  |             | Yes No         |                          |                                  |                  |
|                                           | Others, specify _____                         |                    | Yes No         |                             |                                  |                  |             | Yes No         |                          |                                  |                  |
|                                           | <b>Physical activity</b>                      |                    |                |                             |                                  |                  |             |                |                          |                                  |                  |
|                                           | Study/ do assignment                          |                    | Yes No         |                             |                                  |                  |             | Yes No         |                          |                                  |                  |
|                                           | Dinner                                        |                    | Yes No         |                             |                                  |                  |             | Yes No         |                          |                                  |                  |
|                                           | Read (novel, magazine, comic, etc.)           |                    | Yes No         |                             |                                  |                  |             | Yes No         |                          |                                  |                  |
|                                           | Others, specify _____                         |                    | Yes No         |                             |                                  |                  |             | Yes No         |                          |                                  |                  |
| What time do you sleep at night? ..... pm |                                               |                    |                |                             |                                  |                  |             |                |                          |                                  |                  |

INDONESIAN SCHOOL CHILDREN OBESITY RESEARCH

**SUNDAY**

| 1. Period                        | 2. Time           | 3. Specific activities                                                                                                               | 4. Yes No                                                          | 5. How many times | 6. Duration (minute/ hour) | 7. TV Program |  |
|----------------------------------|-------------------|--------------------------------------------------------------------------------------------------------------------------------------|--------------------------------------------------------------------|-------------------|----------------------------|---------------|--|
| <b>Morning to afternoon</b>      |                   | What time do you wake up in the morning? ..... am                                                                                    |                                                                    |                   |                            |               |  |
|                                  |                   | <b>Screen-based activity</b>                                                                                                         |                                                                    |                   |                            |               |  |
|                                  |                   | Watching TV                                                                                                                          | Yes No                                                             |                   |                            |               |  |
|                                  |                   | Playing (PlayStation, Gameboy, etc.)                                                                                                 | Yes No                                                             |                   |                            |               |  |
|                                  |                   | Using computer/laptop/tablet                                                                                                         | Yes No                                                             |                   |                            |               |  |
|                                  |                   | Others, specify _____                                                                                                                | Yes No                                                             |                   |                            |               |  |
|                                  |                   | <b>Physical activity</b>                                                                                                             |                                                                    |                   |                            |               |  |
|                                  |                   | Cleaning up the rooms / house (e.g. sweeping)                                                                                        | Yes No                                                             |                   |                            |               |  |
|                                  |                   | Washing (clothes, plates)                                                                                                            | Yes No                                                             |                   |                            |               |  |
|                                  |                   | Clean yourself (showering, clothes)                                                                                                  | Yes No                                                             |                   |                            |               |  |
|                                  |                   | Breakfast                                                                                                                            | Yes No                                                             |                   |                            |               |  |
|                                  |                   | Qur'an class/ course                                                                                                                 | Yes No                                                             |                   |                            |               |  |
|                                  |                   | Play<br>- Football<br>- Bike<br>- Badminton<br>- Rope skip<br>- Playing card<br>- Board game (chees, monopoly, etc.)<br>Others _____ | Yes No<br>Yes No<br>Yes No<br>Yes No<br>Yes No<br>Yes No<br>Yes No |                   |                            |               |  |
|                                  |                   | Others, specify _____                                                                                                                | Yes No                                                             |                   |                            |               |  |
| <b>After school until sunset</b> |                   | <b>Screen-based activity</b>                                                                                                         |                                                                    |                   |                            |               |  |
|                                  |                   | Watching TV                                                                                                                          | Yes No                                                             |                   |                            |               |  |
|                                  |                   | Playing (PlayStation, Gameboy, etc.)                                                                                                 | Yes No                                                             |                   |                            |               |  |
|                                  |                   | Using computer/laptop/tablet                                                                                                         | Yes No                                                             |                   |                            |               |  |
|                                  |                   | Others, specify _____                                                                                                                | Yes No                                                             |                   |                            |               |  |
|                                  |                   | <b>Physical activity</b>                                                                                                             |                                                                    |                   |                            |               |  |
|                                  |                   | Siesta                                                                                                                               | Yes No                                                             |                   |                            |               |  |
|                                  |                   | Traveling with family                                                                                                                | Yes No                                                             |                   |                            |               |  |
|                                  |                   | Qur'an class/ course                                                                                                                 | Yes No                                                             |                   |                            |               |  |
|                                  |                   | Play<br>- Football<br>- Bike<br>- Badminton<br>- Rope skip<br>- Playing card<br>- Board game (chees, monopoly, etc.)<br>Others _____ | Yes No<br>Yes No<br>Yes No<br>Yes No<br>Yes No<br>Yes No<br>Yes No |                   |                            |               |  |
|                                  |                   | Afternoon bath                                                                                                                       | Yes No                                                             |                   |                            |               |  |
|                                  |                   | Others, specify _____                                                                                                                | Yes No                                                             |                   |                            |               |  |
|                                  | <b>At bedtime</b> |                                                                                                                                      | <b>Screen-based activity</b>                                       |                   |                            |               |  |
|                                  |                   |                                                                                                                                      | Watching TV                                                        | Yes No            |                            |               |  |
|                                  |                   | Playing (PlayStation, Gameboy, etc.)                                                                                                 | Yes No                                                             |                   |                            |               |  |
|                                  |                   | Using computer/laptop/tablet                                                                                                         | Yes No                                                             |                   |                            |               |  |
|                                  |                   | Others, specify _____                                                                                                                | Yes No                                                             |                   |                            |               |  |
|                                  |                   | <b>Physical activity</b>                                                                                                             |                                                                    |                   |                            |               |  |
|                                  |                   | Study/ do assignment                                                                                                                 | Yes No                                                             |                   |                            |               |  |
|                                  |                   | Dinner                                                                                                                               | Yes No                                                             |                   |                            |               |  |
|                                  |                   | Read (novel, magazine, comic)                                                                                                        | Yes No                                                             |                   |                            |               |  |
|                                  |                   | Others, specify _____                                                                                                                | Yes No                                                             |                   |                            |               |  |
|                                  |                   | What time do you sleep in the night? .....pm                                                                                         |                                                                    |                   |                            |               |  |
